# Supplementary material for: Soundwave Symposium: A Model for Impactful Point-of-care Ultrasound Training in Undergraduate Medical Education
Source: Research Square preprint supplement (doi:10.21203/rs.3.rs-6890964/v1), 2025-07-28
Supplement: Supplementary file 1 [file 9c1e3a35eebaaf52c29aadaa.docx]

| **Pre- Assessment Questions** |
| --- |
| Prior to today, how much experience do you have with Bedside Ultrasound? |
| None, 1-4 hours of training, 4-20 hours of training, 20 or more hours of training             and/or significant clinical ultrasound experience, other |
| **Pre- and Post-Assessment Questions** |
| How important do you perceive bedside ultrasound will be in your career? |
| Rate your comfort with ultrasound in general |
| Rate your comfort with cardiac ultrasound exams |
| Rate your comfort with abdominal ultrasound exams |
| Rate your comfort with eFAST/Trauma ultrasound exams |
| Rate your comfort with vascular ultrasound exams |
| Rate your comfort performing ultrasound-guided procedures |
| **Post-Assessment Questions** |
| How does this course compare to your prior ultrasound training? |
| Far beyond, better, similar, not as good, terrible |
| Would you recommend this program to your colleagues? |
| Strongly yes, yes, neutral, no, strongly no |
| What was your favorite station |
| Cardiac, abdomen, eFAST (Trauma), Vascular, Procedure, Ocular |
| How can we improve this course in the future? |

**Supplemental Table 1.** Pre- and Post-Survey Questions were denoted on a 10-point Likert Scale.


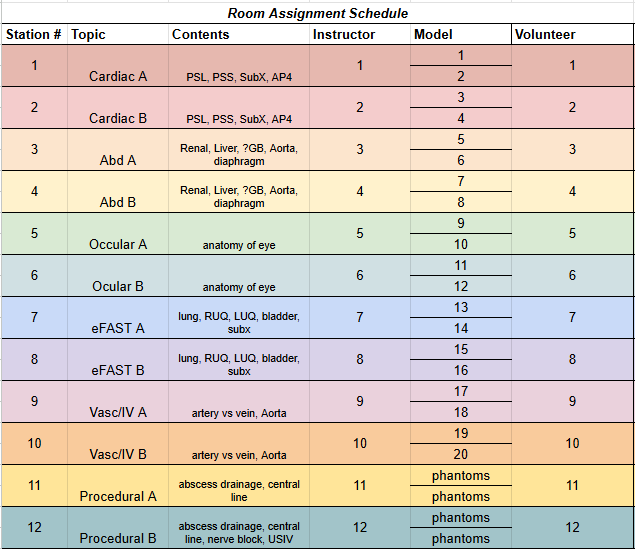


**Supplemental Table 2.** Room Rotation Assignments. Demonstration of room instructor, model, and volunteer staffing for each station.


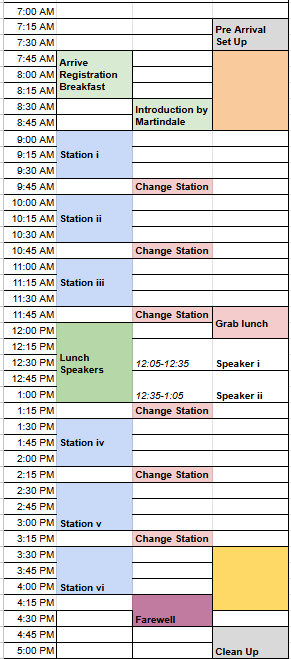


**Supplemental Table 3.** Day of Event Rotation Schedule.

| **Participant Identifier** | **Perceived Importance of US** | | | **General Ultrasound** | | | **Cardiac Comfort** | | | **Abdominal** | | | **eFAST/Trauma** | | | **Vascular** | | | **US-guided procedures** | | |
| --- | --- | --- | --- | --- | --- | --- | --- | --- | --- | --- | --- | --- | --- | --- | --- | --- | --- | --- | --- | --- | --- |
| Pre | Post | Δ | Pre | Post | Δ | Pre | Post | Δ | Pre | Post | Δ | Pre | Post | Δ | Pre | Post | Δ | Pre | Post | Δ |
| **1** | 9 | 10 | 1 | 2 | 7 | 5 | 3 | 9 | 6 | 2 | 6 | 4 | 1 | 6 | 5 | 2 | 9 | 7 | 1 | 8 | 7 |
| **4** | 10 | 10 | 0 | 5 | 10 | 5 | 3 | 8 | 5 | 3 | 9 | 6 | 3 | 9 | 6 | 3 | 9 | 6 | 2 | 8 | 6 |
| **6** | 10 | 10 | 0 | 5 | 8 | 3 | 3 | 8 | 5 | 2 | 8 | 6 | 3 | 8 | 5 | 8 | 9 | 1 | 3 | 9 | 6 |
| **7** | 10 | 10 | 0 | 6 | 8 | 2 | 6 | 7 | 1 | 3 | 8 | 5 | 5 | 8 | 3 | 6 | 10 | 4 | 3 | 9 | 6 |
| **11** | 10 | 10 | 0 | 5 | 7 | 2 | 6 | 8 | 2 | 2 | 6 | 4 | 2 | 7 | 5 | 3 | 7 | 4 | 3 | 7 | 4 |
| **12** | 8 | 8 | 0 | 3 | 7 | 4 | 3 | 6 | 3 | 2 | 8 | 6 | 3 | 8 | 5 | 3 | 8 | 5 | 2 | 6 | 4 |
| **15** | 5 | 4 | -1 | 2 | 3 | 1 | 3 | 4 | 1 | 3 | 3 | 0 | 1 | 5 | 4 | 1 | 2 | 1 | 1 | 2 | 1 |
| **18** | 5 | 5 | 0 | 3 | 5 | 2 | 1 | 4 | 3 | 3 | 7 | 4 | 1 | 7 | 6 | 3 | 8 | 5 | 3 | 8 | 5 |
| **22** | 7 | 6 | -1 | 4 | 7 | 3 | 5 | 6 | 1 | 4 | 7 | 3 | 5 | 7 | 2 | 5 | 6 | 1 | 5 | 6 | 1 |
| **25** | 7 | 7 | 0 | 3 | 6 | 3 | 1 | 5 | 4 | 1 | 7 | 6 | 1 | 8 | 7 | 1 | 7 | 6 | 5 | 5 | 0 |
| **26** | 10 | 10 | 0 | 1 | 7 | 6 | 1 | 8 | 7 | 1 | 6 | 5 | 1 | 6 | 5 | 1 | 9 | 8 | 1 | 7 | 6 |
| **27** | 4 | 4 | 0 | 3 | 8 | 5 | 2 | 8 | 6 | 3 | 8 | 5 | 2 | 8 | 6 | 2 | 8 | 6 | 2 | 8 | 6 |
| **31** | 8 | 10 | 2 | 3 | 7 | 4 | 2 | 6 | 4 | 3 | 7 | 4 | 3 | 6 | 3 | 4 | 7 | 3 | 3 | 6 | 3 |
| **33** | 10 | 10 | 0 | 4 | 9 | 5 | 4 | 9 | 5 | 2 | 9 | 7 | 2 | 9 | 7 | 10 | 10 | 0 | 6 | 9 | 3 |
| **36** | 10 | 10 | 0 | 3 | 6 | 3 | 2 | 5 | 3 | 2 | 5 | 3 | 3 | 5 | 2 | 2 | 5 | 3 | 2 | 5 | 3 |
| **39** | 8 | 9 | 1 | 5 | 8 | 3 | 4 | 6 | 2 | 2 | 6 | 4 | 2 | 8 | 6 | 7 | 8 | 1 | 5 | 7 | 2 |
| **42** | 5 | 7 | 2 | 1 | 4 | 3 | 1 | 4 | 3 | 1 | 4 | 3 | 1 | 4 | 3 | 1 | 4 | 3 | 1 | 4 | 3 |
| **44** | 10 | 10 | 0 | 3 | 5 | 2 | 2 | 5 | 3 | 3 | 5 | 2 | 4 | 5 | 1 | 3 | 4 | 1 | 5 | 4 | -1 |
| **47** | 8 | 5 | -3 | 2 | 6 | 4 | 2 | 8 | 6 | 2 | 6 | 4 | 2 | 8 | 6 | 2 | 5 | 3 | 2 | 5 | 3 |
| **51** | 10 | 10 | 0 | 6 | 8 | 2 | 3 | 8 | 5 | 3 | 8 | 5 | 6 | 8 | 2 | 6 | 8 | 2 | 5 | 8 | 3 |
| **52** | 8 | 8 | 0 | 3 | 7 | 4 | 3 | 7 | 4 | 2 | 6 | 4 | 2 | 6 | 4 | 2 | 6 | 4 | 2 | 5 | 3 |
| **53** | 10 | 10 | 0 | 8 | 8 | 0 | 6 | 7 | 1 | 5 | 8 | 3 | 6 | 9 | 3 | 6 | 7 | 1 | 7 | 8 | 1 |
| **64** | 8 | 9 | 1 | 4 | 9 | 5 | 3 | 9 | 6 | 3 | 9 | 6 | 4 | 9 | 5 | 3 | 9 | 6 | 2 | 9 | 7 |
| **66** | 10 | 8 | -2 | 5 | 8 | 3 | 1 | 7 | 6 | 2 | 8 | 6 | 1 | 8 | 7 | 3 | 10 | 7 | 1 | 6 | 5 |
| **72** | 2 | 5 | 3 | 4 | 6 | 2 | 2 | 5 | 3 | 4 | 8 | 4 | 7 | 9 | 2 | 4 | 6 | 2 | 4 | 6 | 2 |
| **73** | 10 | 9 | -1 | 4 | 6 | 2 | 4 | 6 | 2 | 1 | 6 | 5 | 1 | 6 | 5 | 3 | 6 | 3 | 3 | 5 | 2 |
| **76** | 10 | 10 | 0 | 3 | 6 | 3 | 2 | 5 | 3 | 3 | 6 | 3 | 3 | 6 | 3 | 3 | 6 | 3 | 3 | 5 | 2 |
| **81** | 10 | 10 | 0 | 2 | 10 | 8 | 1 | 10 | 9 | 1 | 10 | 9 | 1 | 10 | 9 | 1 | 10 | 9 | 1 | 10 | 9 |
| **82** | 10 | 10 | 0 | 3 | 5 | 2 | 1 | 5 | 4 | 3 | 6 | 3 | 2 | 5 | 3 | 1 | 5 | 4 | 4 | 4 | 0 |
| **83** | 8 | 10 | 2 | 6 | 9 | 3 | 5 | 9 | 4 | 4 | 9 | 5 | 5 | 9 | 4 | 7 | 8 | 1 | 6 | 7 | 1 |
| **86** | 10 | 10 | 0 | 1 | 8 | 7 | 1 | 8 | 7 | 1 | 7 | 6 | 1 | 7 | 6 | 1 | 8 | 7 | 1 | 8 | 7 |
| **91** | 10 | 10 | 0 | 8 | 9 | 1 | 6 | 8 | 2 | 5 | 8 | 3 | 8 | 9 | 1 | 1 | 6 | 5 | 3 | 5 | 2 |
| **93** | 9 | 9 | 0 | 2 | 8 | 6 | 2 | 8 | 6 | 2 | 7 | 5 | 2 | 9 | 7 | 3 | 8 | 5 | 2 | 8 | 6 |
| **94** | 8 | 10 | 2 | 7 | 8 | 1 | 6 | 8 | 2 | 3 | 8 | 5 | 4 | 8 | 4 | 7 | 8 | 1 | 5 | 8 | 3 |
| **96** | 10 | 10 | 0 | 5 | 6 | 1 | 3 | 5 | 2 | 3 | 5 | 2 | 5 | 5 | 0 | 7 | 6 | -1 | 5 | 6 | 1 |
| **101** | 10 | 10 | 0 | 6 | 8 | 2 | 4 | 8 | 4 | 4 | 8 | 4 | 9 | 9 | 0 | 4 | 7 | 3 | 4 | 7 | 3 |
| **103** | 10 | 10 | 0 | 6 | 9 | 3 | 7 | 9 | 2 | 3 | 9 | 6 | 10 | 9 | -1 | 8 | 7 | -1 | 6 | 8 | 2 |
| **105** | 8 | 9 | 1 | 3 | 5 | 2 | 6 | 7 | 1 | 1 | 4 | 3 | 1 | 4 | 3 | 2 | 4 | 2 | 2 | 6 | 4 |
| **111** | 7 | 3 | -4 | 4 | 8 | 4 | 3 | 7 | 4 | 2 | 6 | 4 | 3 | 8 | 5 | 3 | 7 | 4 | 2 | 7 | 5 |
| **113** | 9 | 9 | 0 | 6 | 8 | 2 | 1 | 7 | 6 | 1 | 7 | 6 | 1 | 7 | 6 | 6 | 8 | 2 | 2 | 8 | 6 |
| **115** | 10 | 10 | 0 | 3 | 6 | 3 | 1 | 6 | 5 | 1 | 7 | 6 | 3 | 8 | 5 | 4 | 7 | 3 | 2 | 5 | 3 |
| **116** | 8 | 9 | 1 | 2 | 5 | 3 | 1 | 5 | 4 | 2 | 2 | 0 | 2 | 3 | 1 | 2 | 5 | 3 | 1 | 2 | 1 |
| **117** | 7 | 7 | 0 | 4 | 4 | 0 | 4 | 5 | 1 | 2 | 5 | 3 | 3 | 4 | 1 | 7 | 4 | -3 | 4 | 4 | 0 |
| avg | 8.51 | 8.60 | 0.09 | 3.91 | 7.02 | 3.12 | 3.02 | 6.81 | 3.79 | 2.44 | 6.79 | 4.35 | 3.14 | 7.14 | 4.00 | 3.74 | 7.00 | 3.26 | 3.07 | 6.47 | 3.40 |
| st dev | 1.97 | 2.05 | 1.22 | 1.78 | 1.66 | 1.74 | 1.81 | 1.59 | 1.96 | 1.09 | 1.73 | 1.75 | 2.29 | 1.77 | 2.28 | 2.39 | 1.89 | 2.53 | 1.67 | 1.89 | 2.29 |
| avg+stdev | 10.48 | 10.65 | 1.31 | 5.69 | 8.68 | 4.86 | 4.84 | 8.40 | 5.75 | 3.53 | 8.52 | 6.10 | 5.43 | 8.91 | 6.28 | 6.14 | 8.89 | 5.78 | 4.74 | 8.35 | 5.69 |
| avg-stdev | 6.55 | 6.55 | -1.12 | 2.13 | 5.36 | 1.37 | 1.21 | 5.22 | 1.83 | 1.36 | 5.06 | 2.60 | 0.85 | 5.37 | 1.72 | 1.35 | 5.11 | 0.73 | 1.40 | 4.58 | 1.11 |

**Supplemental Table 4.** Paired and Matched Participant responses pre- and post-event. Survey responses regarding the comfort of each scan pre- and post-course completion. Responses were matched by deidentified participant numbers assigned at registration. Each response by surveyed Likert scale 1-10.

Instructor Guide (Supplemental Content) —> https://docs.google.com/document/d/1gOuHN3RZ8k6v1DlllMD4_bcZHxYvaXzFMSDjrRWkWQ8/edit?usp=sharing

Volunteer Recruitment Powerpoint ([Supplemental Content](file:///C:\Users\marti\Documents\Brown%20EM\Brown%20EM%20Research\SoundWave%20Symposium\SWS%20Lectures\SWS%20Volunteer%20Primer.pptx))
